# Supplementary material for: Low radon exposures and lung cancer risk: joint analysis of the Czech, French, and Beaverlodge cohorts of uranium miners
Source: Springer Nature journal article supplement (doi:10.1007/s00420-019-01411-w), 2019-02-08
Supplement: MOESM1 [file 16459706]

**Supplementary Table 1 Prevalence of tobacco smoking among controls, by radon exposure categories in a European joint nested case-control study (16)(Nezahat Hunter, special tabulations, 2016-10-17)**

| <b>Cumulative radon exposure (WLM)</b> | <b>Never-smoker<br/>N (%)</b> | <b>Ex-smoker <math>\geq</math> 10 years<br/>N (%)</b> | <b>Current and Ex-smoker &lt; 10 years<br/>N (%)</b> |
|----------------------------------------|-------------------------------|-------------------------------------------------------|------------------------------------------------------|
| < 25                                   | 149 (20.4)                    | 195 (26.7)                                            | 385 (52.8)                                           |
| 25–49                                  | 71 (31.1)                     | 60 (26.3)                                             | 97 (42.5)                                            |
| 50–99                                  | 136 (30.9)                    | 89 (20.2)                                             | 215 (48.9)                                           |

Table only provides smoking prevalence for exposure categories less than 100 WLM.  
Tobacco smoking prevalence reflects the distribution in controls only.

**Supplementary Table 2 Smoking unadjusted and smoking adjusted relative risks of lung cancer mortality at 100 WLM and bias ratios for various case-control studies**

| <b>Nested case-control study</b>                                                   | <b>Smoking-unadjusted RR at 100 WLM</b> | <b>Smoking-adjusted RR at 100 WLM</b> | <b>Bias ratio</b> |
|------------------------------------------------------------------------------------|-----------------------------------------|---------------------------------------|-------------------|
| Leuraud et al. 2011 (17)                                                           | 2.00                                    | 1.80                                  | 1.11              |
| Leuraud et al. 2011 (17) (CZ 1953–, FR & GR 1956–)                                 | 2.70                                    | 2.50                                  | 1.08              |
| Hunter et al. 2013 (16) (< 300 WLM)                                                | 3.30                                    | 2.70                                  | 1.22              |
| Hunter et al. 2013 (16) (< 100 WLM)                                                | 4.90                                    | 4.70                                  | 1.04              |
| Tomasek et al. 2011 (24)                                                           | 2.80                                    | 2.50                                  | 1.12              |
| Tomasek et al. 2013 (25)                                                           | 2.40                                    | 2.30                                  | 1.04              |
| Leuraud et al. 2007 (27)                                                           | 1.98                                    | 1.85                                  | 1.07              |
| Schnelzer et al. 2010 (23)                                                         | 1.25                                    | 1.23                                  | 1.02              |
| L'Abbé et al. 1991 (26)                                                            | 4.89                                    | 4.93                                  | 0.99              |
| Kreuzer et al. 2018 (11)<br>(smoking status available for 56% of 1960+ sub-cohort) | 2.7                                     | 2.3                                   | 1.17              |

Cumulative radon exposures (WLM) were five-year lagged.

Nested case-control studies were matched on cohort, attained age and age at birth.

CZ: Czech; FR: French; GR: German; BL: Beaverlodge.

The bias factor due to smoking difference in each nested case-control study equals the  $RR_{unadjusted} / RR_{adjusted}$  at 100 WLM within the specific nested case-control study.

**Supplementary Table 3 Summary of lung cancer mortality (ERR/100 WLM) by cumulative radon exposure at low exposures or exposure rates from studies of uranium miners**

| Reference                                                                          | No. of cohorts | Included                    | Lung cancer deaths (cases/controls) | Person-years | ERR/WLM | 95% CI        |
|------------------------------------------------------------------------------------|----------------|-----------------------------|-------------------------------------|--------------|---------|---------------|
| Lubin et al. 1997 (5)                                                              | 11             | < 100 WLM                   | 562                                 | 564,772      | 0.008   | 0.003–0.014   |
|                                                                                    |                | < 50 WLM                    | 353                                 | 453,604      | 0.012   | 0.002–0.025   |
| Tomasek et al. 2008 (4)<br>Cz 1952–95, Fr 1946–94                                  | 2              | All Measured exposures      | 574                                 | 248,782      | 0.027   | 0.017–0.043   |
| Leuraud et al. 2011 (17)<br>Late sample:<br>Cz 1953–99, Fr 1956–94<br>& Gr 1956–98 | 3              | All                         | (418/1234)                          |              | 0.017   | 0.009–0.029   |
| Hunter et al. 2013 (16)<br>Cz 1948–99, Fr 1946–94<br>& Gr 1946–98                  | 3              | All                         | (1046/2492)                         |              | 0.008   | 0.004–0.014   |
|                                                                                    |                | < 300 WLM                   | (742/2088)                          |              | 0.017   | 0.009–0.035   |
| Vacquier et al. 2011 (18)<br>Fr post-1955: 1956–99                                 | 1              | All External regression     | 66                                  | 89,405       | 0.0210  | 0.0058–0.0488 |
|                                                                                    |                | All Internal regression     | 66                                  | 89,405       | 0.0212  | 0.0053–0.0528 |
| Rage et al. 2015 (8)<br>Fr post-1955: 1956–07                                      | 1              | All External regression     | 94                                  | 110,548      | 0.023   | 0.009–0.0492  |
|                                                                                    |                | All Internal regression     | 94                                  | 110,548      | 0.024   | 0.009–0.0514  |
| Kreuzer et al. 2015 (13)<br>Gr 1960–08                                             | 1              | All                         | 334                                 | 846,809      | 0.013   | 0.007–0.021   |
|                                                                                    |                | < 100 WLM                   | 306                                 | 834,090      | 0.016   | 0.008–0.028   |
|                                                                                    |                | < 50 WLM                    | 243                                 | 794,923      | 0.013   | 0.001–0.029   |
| Kreuzer et al. 2018 (11)<br>Gr 1946–13:<br>Gr 1960–13:                             | 1              | <100 WLM Measured exposures | 1,254                               | 1,620,190    | 0.016   | 0.008–0.028   |
|                                                                                    |                | Measured exposures          | 495                                 | 956,776      | 0.017   | 0.007–0.032   |
| Rage et al. 2018 (12)<br>Fr 1946–07                                                | 1              | All                         | 211                                 | 186,994      | 0.0073  | 0.0032–0.0133 |
| Navaranjan et al. 2016 (10) Ont. 1954–07                                           | 1              | All                         | 1,230                               | 884,828      | 0.0064  | 0.0043–0.0085 |

CI confidence interval

The studies are based on either restricted to low cumulative exposures, or time periods when mechanical ventilation, routine radon monitoring and high quality exposure measurements were in place.
